# Supplementary material for: A Novel RNA-Seq-Based Model for Preoperative Prediction of Lymph Node Metastasis in Oral Squamous Cell Carcinoma
Source: Biomed Res Int. 2020 Aug 31;2020:4252580. doi: 10.1155/2020/4252580 (PMC7479460; doi:10.1155/2020/4252580)
Supplement: Supplementary materials — Supplementary Table 1: 139 differentially expressed mRNAs between non-LNM and LNM of OSCC. [file 4252580.f1.xlsx]

## Sheet: Sheet1
Supplementary Table 1. 139 differentially expressed mRNAs between non-LNM and LNM of OSCC.
geneID	baseMean	log2FoldChange	lfcSE	stat	pvalue	padj	change
ENSG00000069482.6	230.252	2.10328	0.29035	7.24396	4.36e-13	4.41e-09	up
ENSG00000185615.14	48.464	-2.13784	0.292422	-7.3108	2.66e-13	4.41e-09	down
ENSG00000131095.10	45.1886	-1.8327	0.255614	-7.16978	7.51e-13	5.07e-09	down
ENSG00000262902.1	94.7441	1.51667	0.216213	7.0147	2.3e-12	1.17e-08	up
ENSG00000107954.9	233.36	1.36883	0.198806	6.88524	5.77e-12	2.34e-08	up
ENSG00000100285.9	55.0002	1.2863	0.195627	6.57527	4.86e-11	1.64e-07	up
ENSG00000130294.13	123.163	2.01231	0.313947	6.40971	1.46e-10	4.22e-07	up
ENSG00000133392.15	1666.45	1.35392	0.221921	6.10091	1.05e-09	2.67e-06	up
ENSG00000138675.15	38.5639	1.56082	0.257995	6.0498	1.45e-09	3.26e-06	up
ENSG00000224982.3	54.8193	1.20702	0.2033	5.93717	2.9e-09	5.87e-06	up
ENSG00000198467.12	14466.8	1.15169	0.194798	5.91222	3.38e-09	6.21e-06	up
ENSG00000095627.8	17.0108	1.42659	0.242542	5.88184	4.06e-09	6.85e-06	up
ENSG00000023839.9	98.9945	-1.01164	0.17262	-5.86053	4.61e-09	7.19e-06	down
ENSG00000163126.13	107.252	1.22828	0.211041	5.82009	5.88e-09	8.51e-06	up
ENSG00000202198.1	166.944	1.06727	0.192757	5.53688	3.08e-08	3.98e-05	up
ENSG00000204644.8	48.0422	1.25741	0.227241	5.53339	3.14e-08	3.98e-05	up
ENSG00000254604.1	21.7516	1.07622	0.197377	5.45264	4.96e-08	5.58e-05	up
ENSG00000145879.9	2193.76	-1.85155	0.340455	-5.43845	5.37e-08	5.73e-05	down
ENSG00000170681.6	575.1	1.39734	0.261984	5.33368	9.62e-08	9.28e-05	up
ENSG00000204936.8	1493.73	-1.51955	0.289078	-5.25653	1.47e-07	0.000126426	down
ENSG00000238098.7	16.6409	1.24085	0.23569	5.26474	1.4e-07	0.000126426	up
ENSG00000128591.14	7073.39	1.24693	0.244557	5.09871	3.42e-07	0.000240527	up
ENSG00000169994.17	235.251	1.25606	0.246626	5.09297	3.52e-07	0.000240527	up
ENSG00000179593.14	1260.65	-1.19866	0.235695	-5.08563	3.66e-07	0.000240527	down
ENSG00000248713.1	188.398	1.56343	0.30901	5.0595	4.2e-07	0.000257993	up
ENSG00000136383.6	1040.37	1.03147	0.205025	5.03097	4.88e-07	0.000283301	up
ENSG00000119715.13	17.2463	1.11534	0.222561	5.01141	5.4e-07	0.000290073	up
ENSG00000115414.17	120136	1.0499	0.211128	4.97282	6.6e-07	0.00031071	up
ENSG00000118520.12	185.527	-1.51442	0.305339	-4.9598	7.06e-07	0.00031071	down
ENSG00000137261.12	53.6374	-1.26739	0.254889	-4.97231	6.62e-07	0.00031071	down
ENSG00000164651.15	33.6292	1.43573	0.289397	4.9611	7.01e-07	0.00031071	up
ENSG00000169885.8	19.0716	1.22304	0.246481	4.96201	6.98e-07	0.00031071	up
ENSG00000187527.9	66.5702	-1.56885	0.315635	-4.97045	6.68e-07	0.00031071	down
ENSG00000154553.12	4118.93	1.23938	0.250443	4.94877	7.47e-07	0.000321837	up
ENSG00000205426.9	132.495	1.076	0.218836	4.91693	8.79e-07	0.000363374	up
ENSG00000227082.1	12.9396	1.07676	0.21991	4.89635	9.76e-07	0.000380273	up
ENSG00000166634.5	118.615	-1.50776	0.308179	-4.89247	9.96e-07	0.000380542	down
ENSG00000148357.15	128.257	1.0608	0.217463	4.87808	1.07e-06	0.000393339	up
ENSG00000012223.11	2320.59	-1.72159	0.354919	-4.85067	1.23e-06	0.000415367	down
ENSG00000183287.12	195.996	1.04393	0.215076	4.8538	1.21e-06	0.000415367	up
ENSG00000165379.12	22.4633	1.06475	0.219829	4.84356	1.28e-06	0.000423455	up
ENSG00000167549.17	1130.99	1.08326	0.225676	4.80008	1.59e-06	0.000486708	up
ENSG00000198848.11	4015.68	-1.68597	0.351491	-4.79662	1.61e-06	0.0004878	down
ENSG00000158008.8	27.0354	1.21977	0.25825	4.72322	2.32e-06	0.00063777	up
ENSG00000260398.1	23.5821	1.17465	0.248737	4.72245	2.33e-06	0.00063777	up
ENSG00000280065.1	28.8947	1.42339	0.300999	4.72889	2.26e-06	0.00063777	up
ENSG00000179477.8	1999.47	-1.17875	0.249857	-4.7177	2.39e-06	0.000639757	down
ENSG00000107147.10	27.6183	1.13477	0.241477	4.69929	2.61e-06	0.000655062	up
ENSG00000146038.10	13.4548	1.07658	0.229129	4.69858	2.62e-06	0.000655062	up
ENSG00000130720.11	99.742	1.11763	0.238154	4.69289	2.69e-06	0.000665353	up
ENSG00000121769.6	468.979	1.00213	0.21466	4.66846	3.03e-06	0.000714711	up
ENSG00000125780.11	20089.5	-1.61876	0.351786	-4.60154	4.19e-06	0.000882533	down
ENSG00000139973.14	35.3908	1.02922	0.223471	4.60559	4.11e-06	0.000882533	up
ENSG00000183873.14	140.572	1.08016	0.23579	4.58102	4.63e-06	0.000937171	up
ENSG00000009950.14	90.7898	1.2418	0.272044	4.56471	5e-06	0.000993233	up
ENSG00000186868.14	300.57	1.00011	0.221616	4.51279	6.4e-06	0.00118884	up
ENSG00000109906.12	61.0112	1.16734	0.259929	4.49101	7.09e-06	0.00128191	up
ENSG00000160678.10	699.938	1.09312	0.243932	4.48124	7.42e-06	0.00131848	up
ENSG00000112183.13	273.91	1.17834	0.263213	4.47674	7.58e-06	0.00131944	up
ENSG00000139344.6	81.1896	-1.12327	0.251472	-4.4668	7.94e-06	0.0013289	down
ENSG00000139988.8	984.148	-1.05816	0.239322	-4.42147	9.8e-06	0.00149289	down
ENSG00000050030.12	23.9414	1.20706	0.274833	4.39199	1.12e-05	0.00165972	up
ENSG00000173641.16	2680.25	1.4303	0.326998	4.37403	1.22e-05	0.00171563	up
ENSG00000078295.14	280.211	1.12653	0.258388	4.35983	1.3e-05	0.00180774	up
ENSG00000151572.15	51.2193	-1.05535	0.244676	-4.31327	1.61e-05	0.00203622	down
ENSG00000058404.18	263.102	1.11339	0.258418	4.3085	1.64e-05	0.00206778	up
ENSG00000275011.1	194.349	-1.34994	0.314008	-4.29906	1.72e-05	0.00213128	down
ENSG00000100678.17	47.5115	1.11632	0.261891	4.26253	2.02e-05	0.00233939	up
ENSG00000157765.10	246.13	-1.40734	0.333968	-4.214	2.51e-05	0.00261932	down
ENSG00000130528.10	576.361	1.29205	0.307404	4.20309	2.63e-05	0.00267176	up
ENSG00000108823.14	333.894	1.19833	0.287474	4.16847	3.07e-05	0.00292897	up
ENSG00000203786.6	1352.11	-1.22738	0.297195	-4.12989	3.63e-05	0.00332617	down
ENSG00000141161.10	419.86	1.37986	0.334841	4.12094	3.77e-05	0.00344261	up
ENSG00000102837.6	264.913	-1.50114	0.364443	-4.119	3.81e-05	0.00345609	down
ENSG00000104848.1	71.0276	1.01384	0.246501	4.11294	3.91e-05	0.00349312	up
ENSG00000134398.11	69.024	-1.38887	0.33776	-4.11201	3.92e-05	0.00349312	down
ENSG00000140459.16	61.3386	-1.1168	0.272873	-4.09274	4.26e-05	0.00365856	down
ENSG00000170162.12	49.1304	1.45222	0.355635	4.08347	4.44e-05	0.00372883	up
ENSG00000105825.10	445.16	1.0993	0.272168	4.03907	5.37e-05	0.00422976	up
ENSG00000100593.16	26.2455	1.01083	0.252586	4.00191	6.28e-05	0.00474855	up
ENSG00000106772.16	1124.03	1.03469	0.258999	3.99495	6.47e-05	0.00474855	up
ENSG00000133636.9	415.74	1.5332	0.383386	3.99911	6.36e-05	0.00474855	up
ENSG00000196090.11	17.0638	1.07894	0.271136	3.97932	6.91e-05	0.00485425	up
ENSG00000196482.15	39.8077	1.09243	0.274676	3.97716	6.97e-05	0.00485425	up
ENSG00000269927.1	19.9381	1.03047	0.262588	3.92429	8.7e-05	0.00566209	up
ENSG00000172995.15	263.737	1.54782	0.399027	3.87898	0.000104895	0.00630806	up
ENSG00000166317.10	600.76	1.06638	0.275079	3.87664	0.000105911	0.00630917	up
ENSG00000007306.13	366.656	-1.30798	0.337525	-3.87522	0.000106528	0.00632733	down
ENSG00000187173.3	80.9366	-1.48292	0.383611	-3.8657	0.000110772	0.00643752	down
ENSG00000170323.7	4331.76	-1.2647	0.328784	-3.8466	0.000119767	0.00679487	down
ENSG00000133454.14	636.033	1.15422	0.302477	3.81588	0.000135699	0.00738829	up
ENSG00000159173.17	6543.26	1.10909	0.290759	3.81448	0.000136468	0.00741024	up
ENSG00000101605.11	619.751	1.02349	0.269646	3.79567	0.000147245	0.00778669	up
ENSG00000138615.5	358.377	1.04827	0.278003	3.77073	0.000162772	0.00825451	up
ENSG00000129654.7	87.6464	-1.38381	0.369091	-3.74924	0.000177371	0.00865608	down
ENSG00000120729.8	817.688	1.16812	0.312491	3.7381	0.000185416	0.0088182	up
ENSG00000170500.11	66.6284	1.02857	0.277501	3.70654	0.000210109	0.00953203	up
ENSG00000127325.17	162.745	1.15808	0.313208	3.69748	0.000217755	0.00973598	up
ENSG00000267056.2	134.455	-1.12466	0.306312	-3.67161	0.000241025	0.0102495	down
ENSG00000176075.7	48.6708	-1.12921	0.310467	-3.63714	0.000275683	0.0110349	down
ENSG00000166948.8	31.7643	-1.27033	0.350681	-3.62247	0.000291803	0.0113096	down
ENSG00000138100.12	520.484	1.22121	0.339356	3.59862	0.000319916	0.0118241	up
ENSG00000101282.7	45.6535	1.0016	0.278894	3.59133	0.000329	0.0120499	up
ENSG00000147573.15	94.7194	1.03889	0.290156	3.58045	0.000343009	0.0123872	up
ENSG00000164309.13	2773.29	1.01544	0.286777	3.54087	0.000398803	0.0137137	up
ENSG00000114854.6	3163.35	1.24951	0.353468	3.53501	0.000407765	0.0139273	up
ENSG00000078328.18	81.9964	1.15139	0.327174	3.5192	0.000432855	0.0143958	up
ENSG00000163209.13	43318.1	-1.11244	0.321405	-3.4612	0.000537783	0.0167316	down
ENSG00000155657.22	9776.3	1.03325	0.298857	3.45734	0.000545536	0.0168178	up
ENSG00000101892.10	123.087	1.21498	0.352937	3.4425	0.000576363	0.0172943	up
ENSG00000159455.8	99.9922	-1.50297	0.437198	-3.43774	0.000586583	0.0174715	down
ENSG00000196296.12	1329.29	1.07042	0.311901	3.43192	0.000599328	0.0176436	up
ENSG00000122367.18	781.885	1.01827	0.298795	3.40792	0.000654609	0.0185693	up
ENSG00000175084.10	27266.9	1.23797	0.36317	3.40878	0.000652544	0.0185693	up
ENSG00000166736.10	72.0534	-1.06101	0.313423	-3.38523	0.000711199	0.019361	down
ENSG00000160808.8	176.91	1.05928	0.316971	3.3419	0.000832081	0.0214142	up
ENSG00000138136.6	19.8048	1.12862	0.337937	3.33975	0.000838552	0.0214988	up
ENSG00000018625.13	715.986	1.06379	0.318841	3.33643	0.00084861	0.0216993	up
ENSG00000133878.7	272.588	1.05084	0.316336	3.32192	0.000894019	0.0222772	up
ENSG00000104327.6	855.436	1.18849	0.358115	3.31874	0.000904256	0.0224199	up
ENSG00000111245.13	4040.48	1.31681	0.401732	3.27782	0.00104611	0.0244947	up
ENSG00000197616.10	107.067	1.19943	0.369807	3.2434	0.00118113	0.0263811	up
ENSG00000130433.6	93.1887	1.19555	0.370438	3.2274	0.0012492	0.0274716	up
ENSG00000177354.10	317.908	1.32359	0.411183	3.21897	0.00128651	0.0277793	up
ENSG00000068976.12	615.581	1.02183	0.318364	3.20963	0.00132905	0.0282462	up
ENSG00000174429.3	38.6227	1.1442	0.356597	3.20867	0.00133352	0.0282523	up
ENSG00000086967.9	2510.34	1.11581	0.348771	3.19927	0.00137776	0.0288814	up
ENSG00000223350.2	88.4995	1.04712	0.331299	3.16066	0.00157412	0.0310687	up
ENSG00000187223.3	55.3459	-1.25673	0.398735	-3.15179	0.00162271	0.0313312	down
ENSG00000108878.4	210.179	1.14363	0.363646	3.14491	0.0016614	0.0316443	up
ENSG00000164122.7	531.531	1.20752	0.385468	3.13262	0.00173255	0.0323806	up
ENSG00000197953.5	90.2647	-1.11071	0.356229	-3.11797	0.00182099	0.0333912	down
ENSG00000163833.7	45.3264	1.21351	0.389692	3.11403	0.00184548	0.0334632	up
ENSG00000272573.4	30.8152	1.08615	0.34991	3.10408	0.00190873	0.0338974	up
ENSG00000198842.8	292.098	1.12293	0.363712	3.0874	0.00201916	0.0351341	up
ENSG00000133055.7	3181.76	1.14569	0.378253	3.02889	0.00245457	0.0391455	up
ENSG00000173991.5	3311.66	1.00835	0.3439	2.93211	0.00336671	0.0470971	up
ENSG00000133020.4	254.104	1.1191	0.383771	2.91606	0.00354477	0.0482823	up
ENSG00000092054.12	4819.92	1.12848	0.387548	2.91185	0.00359294	0.048644	up
